# Supplementary material
Source: PubMed Central journal article supplement (PMC3713227)
Supplement: NIHMS474787-supplement-Figure_1.pdf [file NIHMS474787-supplement-Figure_1.pdf]

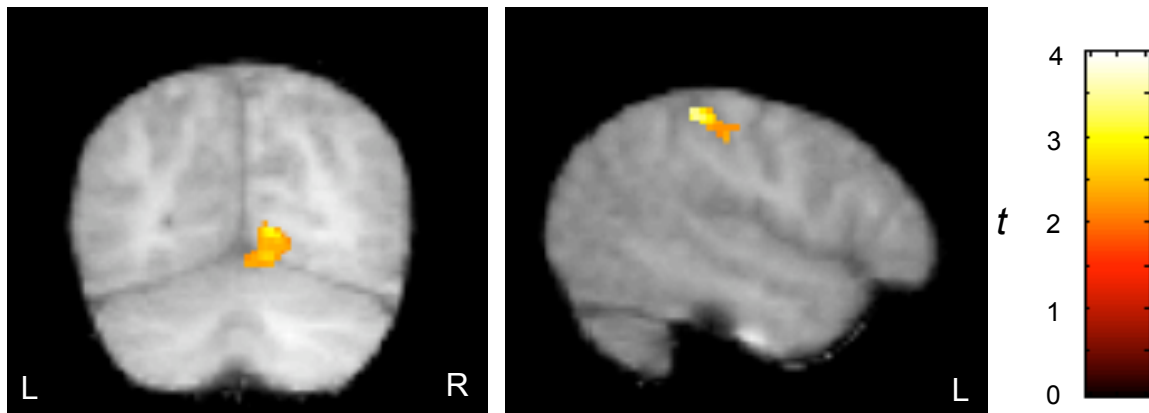

**Supplementary Figure 1.** Reliably greater activity in ASD children vs. typically developing children during imitation comprised right visual and left anterior parietal areas (thresholded at  $t > 1.83$ ,  $P < 0.05$ , corrected for multiple comparisons at the cluster level).
