# Supplementary material
Source: PubMed Central journal article supplement (PMC3713227)
Supplement: NIHMS474787-supplement-Figure_2.pdf [file NIHMS474787-supplement-Figure_2.pdf]

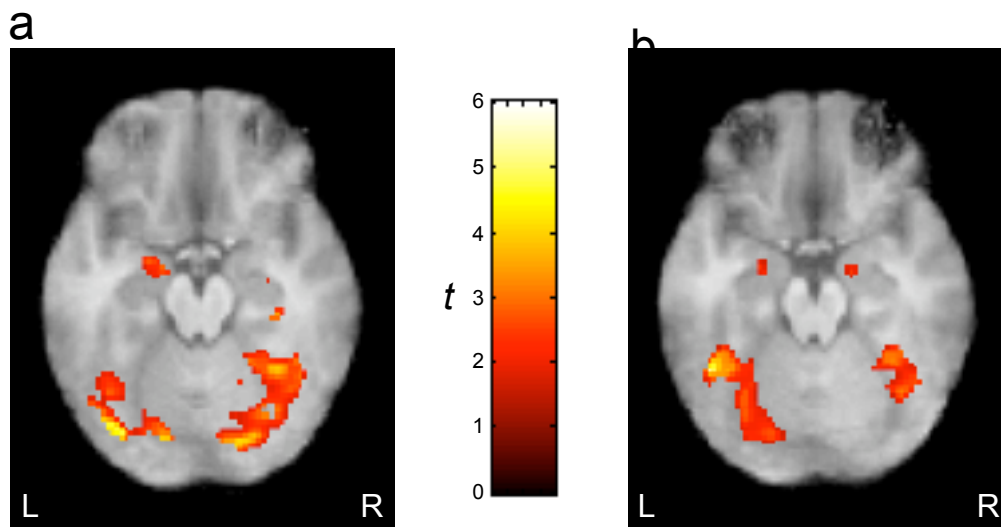

**Supplementary Figure 2.** Reliable signal increases during observation of facial emotional expressions in both typically developing (**a**) and ASD group (**b**) groups comprised the fusiform gyrus and the amygdala (thresholded at  $t > 1.83$ ,  $P < 0.05$ , corrected for multiple comparisons at the cluster level; small volume correction for the amygdala).
