# Supplementary material
Source: PubMed Central journal article supplement (PMC3713227)
Supplement: NIHMS474787-supplement-Table_1.pdf [file NIHMS474787-supplement-Table_1.pdf]

**Supplementary Table 1.** Subject Demographics for Children Participating in the fMRI Study

|                        | <b>ASD Group (N=10)</b><br>(Mean/SD) | <b>TD Group (N=10)</b><br>(Mean/SD) |
|------------------------|--------------------------------------|-------------------------------------|
| Chronological Age      | 12.05 (+/- 2.5)                      | 12.38 (+/- 2.2)                     |
| Full Scale IQ          | 96.4 (+/- 18.3)                      | 106.7 (+/- 15.9)                    |
| ADOS (Social Subscale) | 8.5 (+/- 3.0)                        | NA                                  |
| ADI (Social Subscale)  | 20.3 (+/- 4.9)                       | NA                                  |

IQ assessed with Wechsler Intelligence Scale for Children–Third Edition (WISC-III) or Wechsler Abbreviated Scale of Intelligence (WASI)
