# Supplementary material
Source: PubMed Central journal article supplement (PMC3713227)
Supplement: NIHMS474787-supplement-Table_2.pdf [file NIHMS474787-supplement-Table_2.pdf]

**Supplementary Table 2.** Subject Demographics for Subset of Children Participating in Both fMRI and Behavioral Eye-Tracking Sessions

|                        | <b>ASD Group (N=5)</b><br>(Mean/SD) | <b>TD Group (N=5)</b><br>(Mean/SD) |
|------------------------|-------------------------------------|------------------------------------|
| Chronological Age      | 12.50 (+/- 2.8)                     | 13.02 (+/- 2.1)                    |
| Full Scale IQ          | 92.00 (+/- 19.4)                    | 105.2 (+/- 12.8)                   |
| ADOS (Social Subscale) | 8.4 (+/- 3.3)                       | NA                                 |
| ADI (Social Subscale)  | 18.8 (+/- 5.2)                      | NA                                 |

IQ assessed with Wechsler Intelligence Scale for Children–Third Edition (WISC-III) or Wechsler Abbreviated Scale of Intelligence (WASI)
