# Supplementary material
Source: PubMed Central journal article supplement (PMC3713227)
Supplement: NIHMS474787-supplement-Table_3.pdf [file NIHMS474787-supplement-Table_3.pdf]

**Supplementary Table 3.** Peaks of Activity during Imitation of Emotional Expressions

| Anatomical Region       | BA | H | TD Group |     |     |      | ASD Group |     |     |       | TD > ASD |     |     |      |
|-------------------------|----|---|----------|-----|-----|------|-----------|-----|-----|-------|----------|-----|-----|------|
|                         |    |   | x        | y   | z   | t    | x         | y   | z   | t     | x        | y   | z   | t    |
| Central Sulcus          | 4  | L | -44      | -6  | 44  | 4.93 | -52       | -16 | 38  | 5.24  |          |     |     |      |
|                         | 4  | R | 42       | -16 | 34  | 4.30 | 46        | -6  | 20  | 5.14  |          |     |     |      |
| Precentral Gyrus        | 6  | L | -42      | -8  | 38  | 5.94 | -62       | 2   | 22  | 5.62  |          |     |     |      |
|                         | 6  | R | 48       | 0   | 20  | 5.21 | 56        | -2  | 14  | 3.63  | 54       | 8   | 6   | 3.32 |
| Medial Frontal Gyrus    | 6  | R | 2        | 0   | 60  | 4.87 |           |     |     |       |          |     |     |      |
| Anterior Cingulate      | 32 | R | 12       | 20  | 34  | 4.48 |           |     |     |       | 12       | 20  | 34  | 4.48 |
| Middle Frontal Gyrus    | 9  | L | -36      | 40  | 26  | 4.89 |           |     |     |       |          |     |     |      |
|                         | 9  | R | 50       | 0   | 40  | 4.21 |           |     |     |       |          |     |     |      |
| Inferior Frontal Gyrus  | 44 | L | -50      | 8   | 10  | 5.10 |           |     |     |       | -50      | 10  | 12  | 3.37 |
|                         | 44 | R | 54       | 10  | 8   | 5.38 |           |     |     |       | 56       | 10  | 14  | 3.25 |
| Inferior Frontal Gyrus  | 45 | L | -40      | 20  | 2   | 4.14 |           |     |     |       |          |     |     |      |
|                         | 45 | R | 42       | 36  | 8   | 5.14 |           |     |     |       |          |     |     |      |
| Insula                  |    | L | -36      | -4  | 10  | 5.32 |           |     |     |       | -36      | -2  | 14  | 5.22 |
|                         |    | R | 36       | 2   | 4   | 4.00 |           |     |     |       | 26       | 14  | 12  | 3.46 |
| Postcentral Gyrus       | 3  | L | -42      | -18 | 38  | 4.47 | -46       | -16 | 30  | 4.47  |          |     |     |      |
|                         | 2  | R | 58       | -12 | 20  | 4.21 |           |     |     |       |          |     |     |      |
| Supramarginal Gyrus     | 40 | L |          |     |     |      | -34       | -38 | 52  | 5.08  |          |     |     |      |
| Superior Temporal Gyrus | 22 | L | -52      | 4   | 2   | 5.39 |           |     |     |       |          |     |     |      |
|                         | 22 | R | 48       | 12  | -4  | 5.02 |           |     |     |       |          |     |     |      |
| Temporal pole           | 38 | R | 28       | 4   | -24 | 4.78 |           |     |     |       |          |     |     |      |
| Fusiform Gyrus          | 37 | L | -34      | -62 | -18 | 5.40 | -44       | -50 | -14 | 4.45  |          |     |     |      |
|                         | 37 | R | 30       | -62 | -16 | 4.68 | 34        | -50 | -12 | 3.70  |          |     |     |      |
| Lingual Gyrus           | 18 | L | -18      | -78 | -12 | 4.68 | -8        | -72 | 4   | 5.57  |          |     |     |      |
|                         | 18 | R | 6        | -74 | -4  | 5.13 | 10        | -80 | 2   | 5.05  |          |     |     |      |
| Middle Occipital Gyrus  | 19 | L | -44      | -64 | -4  | 6.05 | -26       | -66 | -4  | 4.48  |          |     |     |      |
|                         | 19 | R | 40       | -70 | -4  | 5.31 | 26        | -66 | 0   | 3.97  |          |     |     |      |
| Amygdala                |    | L | -18      | -10 | -8  | 5.06 | -20       | -12 | -8  | 2.18* | -22      | -6  | -8  | 3.41 |
|                         |    | R | 18       | -8  | -8  | 4.56 | 20        | -4  | -12 | 3.75  | 30       | -4  | -16 | 2.93 |
| Hippocampus             |    | L | -36      | -12 | -8  | 4.50 |           |     |     |       | -40      | -14 | -12 | 4.00 |
|                         |    | R | 32       | -12 | -8  | 4.54 |           |     |     |       | 36       | -18 | -8  | 3.96 |
| Caudate                 |    | R | 16       | 4   | 8   | 6.82 |           |     |     |       | 10       | 6   | 6   | 4.02 |
| Putamen                 |    | L | -28      | -10 | 8   | 6.17 |           |     |     |       |          |     |     |      |
|                         |    | R | 20       | -4  | 8   | 5.34 |           |     |     |       | 30       | -24 | 0   | 4.38 |
| Thalamus                |    | L | -14      | -24 | 14  | 6.13 |           |     |     |       | -32      | -32 | 6   | 4.95 |
|                         |    | R | 4        | -18 | 12  | 5.89 |           |     |     |       |          |     |     |      |
| Cerebellum              |    | L | -30      | -58 | -22 | 4.77 | -34       | -68 | -16 | 3.94  |          |     |     |      |
|                         |    | R | 26       | -66 | -20 | 4.83 | 28        | -52 | -20 | 3.63  |          |     |     |      |

$P < 0.05$ , corrected for multiple comparisons, cluster level,  $P < 0.01$ , voxel level; \*Small Volume Correction. BA refers to putative Brodmann Area; L and R refer to left and right hemispheres; x, y, and z refer to the Talairach coordinates corresponding to the left-right, anterior-posterior, and inferior-superior axes, respectively;  $t$  refers to the highest  $t$  score within a region.
