# Supplementary material
Source: PubMed Central journal article supplement (PMC3713227)
Supplement: NIHMS474787-supplement-Table_4.pdf [file NIHMS474787-supplement-Table_4.pdf]

**Supplementary Table 4.** Peaks of Activity during Observation of Emotional Expressions

| Anatomical Region      | BA | H | TD Group |     |     |       | ASD Group |     |     |       |
|------------------------|----|---|----------|-----|-----|-------|-----------|-----|-----|-------|
|                        |    |   | x        | y   | z   | t     | x         | y   | z   | t     |
| Inferior Frontal Gyrus | 44 | L | -52      | 12  | 4   | 2.55* |           |     |     |       |
|                        |    | R | 52       | 10  | 12  | 1.96* |           |     |     |       |
| Inferior Frontal Gyrus | 45 | L | -52      | 36  | 2   | 2.43* |           |     |     |       |
|                        |    | R | 42       | 26  | 2   | 2.25* |           |     |     |       |
| Insula                 |    | R | 30       | 34  | 2   | 4.01* |           |     |     |       |
| Amygdala               |    | L | -18      | -8  | -12 | 2.85* | -26       | -10 | -10 | 3.41* |
|                        |    | R |          |     |     |       | 22        | -10 | -8  | 4.19  |
| Fusiform Gyrus         | 37 | L | -38      | -76 | -12 | 4.65  | -48       | -52 | -14 | 5.68  |
|                        | 37 | R | 32       | -52 | -12 | 3.84  | 36        | -64 | -12 | 3.45  |
| Lingual Gyrus          | 18 | L | -18      | -78 | -8  | 5.75  | -18       | -80 | -10 | 5.50  |
|                        | 18 | R | 10       | -82 | -8  | 4.97  | 6         | -76 | 2   | 5.98  |
| Middle Occipital Gyrus | 19 | L | -34      | -84 | 2   | 3.71  | -32       | -62 | -6  | 4.43  |
|                        | 19 | R | 36       | -70 | -4  | 4.51  | 36        | -74 | -4  | 4.24  |
| Hippocampal Gyrus      | 30 | L |          |     |     |       | -22       | -40 | -2  | 3.06  |
| Cerebellum             |    | L | -42      | -60 | -14 | 3.34  |           |     |     |       |
|                        |    | R | 30       | -68 | -14 | 3.33  | 30        | -48 | -16 | 3.75  |

$P < 0.05$ , corrected for multiple comparisons, cluster level,  $P < 0.01$ , voxel level; \*Small Volume Correction.

BA refers to putative Brodmann Area; L and R refer to left and right hemispheres; x, y, and z refer to the Talairach coordinates corresponding to the left-right, anterior-posterior, and inferior-superior axes, respectively; t refers to the highest t score within a region.
