# Supplementary material
Source: PubMed Central journal article supplement (PMC3713227)
Supplement: NIHMS474787-supplement-Table_5.pdf [file NIHMS474787-supplement-Table_5.pdf]

**Supplementary Table 5.** Negative Correlations Between Activity During Imitation of Emotional Expressions and Subjects' Scores on the Social Subscales of the ADOS and ADI

| Anatomical Region      | BA | H | ADOS |     |     |      | ADI |     |    |       |
|------------------------|----|---|------|-----|-----|------|-----|-----|----|-------|
|                        |    |   | x    | y   | z   | t    | x   | y   | z  | t     |
| Inferior Frontal Gyrus | 44 | L |      |     |     |      | -54 | 8   | 12 | 5.43  |
|                        |    | R | 44   | 18  | 22  | 4.56 | 54  | 14  | 10 | 3.49  |
| Insula                 |    | R | 28   | 16  | 12  | 4.03 | 28  | 14  | 14 | 4.02  |
| Amygdala               |    | L | -36  | -12 | -10 | 3.02 |     |     |    |       |
| Caudate                |    | L |      |     |     |      | -16 | 18  | 12 | 4.75  |
| Putamen                |    | L | 16   | -10 | 10  | 3.14 | -20 | -12 | 6  | 8.45  |
|                        |    | R | 28   | 12  | 4   | 3.28 | 18  | -8  | 6  | 5.15  |
| Globus Pallidum        |    | L |      |     |     |      | -18 | -6  | -6 | 10.01 |
|                        |    | R |      |     |     |      | 16  | -4  | -2 | 7.12  |

$P < 0.05$ , corrected for multiple comparisons, cluster level,  $P < 0.01$ , voxel level.

BA refers to putative Brodmann Area; L and R refer to left and right hemispheres; x, y, and z refer to the Talairach coordinates corresponding to the left-right, anterior-posterior, and inferior-superior axes, respectively;  $t$  refers to the highest  $t$  score within a region.
